# Supplementary material for: Relationship between autonomic nervous function and brain functions such as memory and attention
Source: Research Square preprint supplement (doi:10.21203/rs.3.rs-2983797/v1), 2023-05-30
Supplement: Supplementary file 1 [file 37bc96b2b90a631313d3ed51.xlsx]

## Sheet: Table1
Table 1. Association between autonomic nervous functions and the results of kana picking test.
Table1-1. Association between LogLF and the results of kana picking test.
	interval A		interval B		interval C		interval D
KPS	0.2818	**	0.1349		0.234	*	0.2046	*
memory score	0.4048	***	0.4823	***	0.3455	***	0.3311	***
*p < 0.05, **p < 0.01, ***p < 0.001
Table1-2. Association between LogHF and the results of kana picking test.
	interval A		interval B		interval C		interval D
KPS	0.2666	**	0.2707	**	0.244	*	0.2407	*
memory score	0.5138	***	0.552	***	0.5227	***	0.4859	***
*p < 0.05, **p < 0.01, ***p < 0.001
Table1-3. Association between LogLF/HF and the results of kana picking test.
	interval A		interval B		interval C		interval D
KPS	-0.0576		-0.251	*	-0.0564		-0.1212
memory score	-0.2401	*	-0.2315	*	-0.3306	***	-0.3183	**
*p < 0.05, **p < 0.01, ***p < 0.001
Table1-4. Association between LogTP and the results of kana picking test.
	interval A		interval B		interval C		interval D
KPS	0.3331	***	0.1865		0.2602	**	0.2448	*
memory score	0.4895	***	0.5295	***	0.4178	***	0.411	***
*p < 0.05, **p < 0.01, ***p < 0.001
